# Supplementary material for: Non-linear effects of pore pressure increase on seismic event generationin multi-degree-of-freedom rate-and-state model of tectonic fault sliding
Source: Copernicus journal article supplement (doi:10.5194/npg-2016-66), 2016-12-12
Supplement: Supplementary file [file npg-2016-66-RC2-supplement.pdf]

**Review of NPG-2016-66, by Sergey B. Turuntaev and Vasily Y. Riga,**

**“Non-linear effects of pore pressure increase on seismic event generation in multi-degree-of-freedom rate-and-state model of tectonic fault sliding”**

The authors have presented interesting results of a numerical study on nonlinear effects of pore pressure increase on seismic event generation in multi-degree-of-freedom rate-and-state model of tectonic fault sliding. The paper is worth to be published after taking into account the items that follow.

1. English needs a thorough review. It is the author's responsibility to revise the English in the entire manuscript to a much higher standard.
2. Expressions relating the  $F_{fi}$  in the Eq. (1) and shear stress are absent, of course, it is evident, but it is necessary to note.
3. Please emphasize the differences with the literatures Häring et al., 2008, Dinske, 2010.
